# Supplementary material for: The Epidemiology of Transition into Adulthood of Rare Diseases Patients: Results from a Population-Based Registry
Source: Int J Environ Res Public Health. 2018 Oct 10;15(10):2212. doi: 10.3390/ijerph15102212 (PMC6210512; doi:10.3390/ijerph15102212)
Supplement: Supplementary file 1 [file ijerph-15-02212-s001.xls]

## Sheet: Foglio1
NAME OF DISEASE OR GROUP OF DISEASES DIVIDED ACCORDING TO ICD-9 CM NOSOLOGIC GROUPS	EXAMPLES OF DISEASES INCLUDED INTO GROUPS
1. INFECTIOUS AND PARASITIC DISEASES (001-139)
LEPROSY
WHIPPLE DISEASE
LYME DISEASE
2. NEOPLASMS (140-239)
WILMS TUMOR
RETINOBLASTOMA
CRONKHITE-CANADA SYNDROME
GARDNER SYNDROME
FAMILIAL ADENOMATOUS POLYPOSIS
LYMPHANGIOLEIOMYOMATOSIS
NEUROFIBROMATOSIS*
3. ENDOCRINE, NUTRITIONAL AND METABOLIC DISEASES, AND IMMUNITY DISORDERS (240-279)
CONGENITAL ISOLATED ACTH DEFICIENCY
KALLMANN SYNDROME
FAMILIAL HYPERALDOSTERONISMS*
CONGENITAL ADRENOGENITAL SYNDROME
FAMILIAL PARTIAL ANDROGEN INSENSITIVITY SYNDROME
AUTOIMMUNE POLYENDOCRINOPATHIES*	SCHMIDT SYNDROME
IDIOPATHIC CENTRAL PRECOCIOUS PUBERTY
LEPRECHAUNISM
WERNER SYNDROME
ACRODERMATITIS ENTEROPATHICA, ZINC DEFICIENCY TYPE
DISORDERS OF CARBOHYDRATE TRANSPORT AND METABOLISM*	CYSTINOSIS
	HARTNUP SYNDROME
	ALBINISM
	ALKAPTONURIA
	MAPLE SYRUP URINE DISEASE
	HOMOCYSTINURIA
	ORGANIC ACIDURIAS AND CONGENITAL LACTIC ACIDOSES
	GALACTOSIALIDOSIS
	METHYLMALONIC ACIDEMIA
	PYRUVATE CARBOXYLASE DEFICIENCY
UREA CYCLE DISORDERS*	CITRULLINEMIA
	HYPERAMMONEMIA DUE TO N-ACETYLGLUTAMATE SYNTHETASE DEFICIENCY
DISORDERS OF CARBOHYDRATE TRANSPORT AND METABOLISM* EXCLUDES:DIABETES MELLITUS	GLYCOGEN STORAGE DISEASE
	GALACTOSEMIA
	HEREDITARY FRUCTOSE INTOLERANCE
	CONGENITAL SUCRASE-ISOMALTASE DEFICIENCY
DISORDERS OF LIPOID METABOLISM* EXCLUDES: HETEROZYGOUS FAMILIAL HYPERCHOLESTEROLEMIA TYPE IIA AND IIB; POLYGENIC PRIMARY HYPERCHOLESTEROLEMIA; COMBINED FAMILIAL HYPERCHOLESTEROLEMIA; HYPERLIPOPROTEINEMIA TYPE III	HOMOZYGOUS FAMILIAL HYPERCHOLESTEROLEMIA TYPE IIA
	FAMILIAL LIPOPROTEIN LIPASE DEFICIENCY
	HOMOZYGOUS FAMILIAL HYPERCHOLESTEROLEMIA TYPE IIB
	HYPOBETALIPOPROTEINEMIA
	ABETALIPOPROTEINEMIA
	TANGIER DISEASE
	LECITHIN CHOLESTEROL ACYL TRANSFERASE DEFICIENCY
	FAMILIAL HYPERTRIGLYCERIDEMIA
	CEREBROTENDINOUS XANTHOMATOSIS
FATTY ACID OXIDATION AND MITOCHONDRIAL DEFECTS *
CONGENITAL GENERALIZED LIPODYSTROPHY
LIPID STORAGE DISORDERS*	FABRY DISEASE
	GAUCHER DISEASE
	NIEMANN-PICK DISEASE
MUCOLIPIDOSES*
DERCUM'S DISEASE
FARBER LIPOGRANULOMATOSIS
MIXED CRYOGLOBULINEMIA
HEREDITARY CERULOPLASMIN DEFICIENCY
CONGENITAL ATRANSFERRINEMIA
WALDMANN DISEASE
INHERITED DISORDERS OF IRON METABOLISM*	HEREDITARY HEMOCHROMATOSIS
	HEREDITARY HYPERFERRITINEMIA-CATARACT SYNDROME
WILSON DISEASE
HYPOPHOSPHATASIA
HYPOPHOSPHATAEMIC VITAMIN D RESISTANT RICKETS
DISORDERS OF PORPHYRIN METABOLISM*
DISORDERS OF PURINE OR PYRIMIDINE METABOLISM*	LESCH-NYHAN SYNDROME
	HEREDITARY XANTHINURIA
HEREDITARY AMYLOIDOSES*
CRIGLER-NAJJAR SYNDROME
MUCOPOLYSACCHARIDOSES*	HUNTER SYNDROME
	HURLER SYNDROME
	MAROTEAUX-LAMY DISEASE
	MORQUIO DISEASE
	SANFILIPPO SYNDROME
	SCHEIE SYNDROME
HEREDITARY ANGIOEDEMA
ALPHA-1-ANTITRYPSIN DEFICIENCY
CHRONIC HISTIOCYTOSES*	HISTIOCYTOSIS X
PRIMARY IMMUNODEFICIENCIES*	AGAMMAGLOBULINEMIA
	DIGEORGE SYNDROME
	NEZELOF SYNDROME
BEHÇET'S DISEASE
4. DISEASES OF THE BLOOD AND BLOOD-FORMING ORGANS (280-289)
HEREDITARY ANEMIAS*	HEREDITARY SPHEROCYTOSIS
	THALASSEMIAS
	SICKLE-CELL DISEASE
	BLACKFAN-DIAMOND ANEMIA
	FANCONI ANEMIA
	SIDEROBLASTIC ANEMIAS
	HEREDITARY METHEMOGLOBINEMIA
HEMOLYTIC UREMIC SYNDROME
PAROXYSMAL NOCTURNAL HEMOGLOBINURIA
HEREDITARY COAGULATION DEFECTS*	HEMOPHILIA A
	HEMOPHILIA B
	CONGENITAL DEFICIENCY OF OTHER CLOTTING FACTORS
	VON WILLEBRAND'S DISEASE
	HEREDITARY THROMBOPHILIAS
RECURRENT SCHÖNLEIN-HENOCH PURPURA
HEREDITARY PLATELET DEFECTS*	BERNARD-SOULIER SYNDROME
	ALPHA STORAGE POOL DEFICIENCY
	GLANZMANN THROMBASTHENIA
PRIMARY HEREDITARY THROMBOCYTOPENIAS*	CONGENITAL AMEGAKARYOCYTIC THROMBOCYTOPENIA
CYCLIC NEUTROPENIA
CHRONIC GRANULOMATOUS DISEASE
CHEDIAK-HIGASHI'S SYNDROME
5. DISEASES OF THE NERVOUS SYSTEM (320-359 )
LEUKODYSTROPHIES*	ALEXANDER DISEASE
	CANAVAN DISEASE
	KRABBE DISEASE
	METACHROMATIC LEUKODYSTROPHY
	PELIZAEUS-MERZBACHER DISEASE
CEROID LIPOFUSCINOSIS *	BATTEN DISEASE
	KUFS DISEASE
GANGLIOSIDOSES*
ALPERS SYNDROME
KEARNS-SAYRE SYNDROME
LEIGH DISEASE
RETT SYNDROME
DENTATO-RUBRO-PALLIDO-LUYSIAN ATROPHY
PROGRESSIVE MYOCLONIC EPILEPSY
HEREDITARY ESSENTIAL MYOCLONUS
HUNTINGTON DISEASE
IDIOPATHIC TORSION DYSTONIA
SPINOCEREBELLAR DISEASES*	FRIEDREICH'S ATAXIA
	HEREDITARY SPASTIC PARAPLEGIA
	MARIE'S CEREBELLAR ATAXIA
	SUBACUTE CEREBELLAR DEGENERATION
	EPISODIC ATAXIA
	MARINESCO-SJÖGREN SYNDROME
	FRIEDREICH-LIKE ATAXIA
	ATAXIA-TELANGIECTASIA
SPINAL MUSCULAR ATROPHIES *	WERDNIG-HOFFMANN DISEASE
	KUGELBERG-WELANDER DISEASE
	KENNEDY'S DISEASE
AMYOTROPHIC LATERAL SCLEROSIS
PRIMARY LATERAL SCLEROSIS
ADRENOLEUKODYSTROPHY
LENNOX-GASTAUT SYNDROME
WEST SYNDROME
NARCOLEPSY
MELKERSSON-ROSENTHAL SYNDROME
HEREDITARY NEUROPATHIES*	DEJERINE-SOTTAS SYNDROME
	CONGENITAL HYPOMYELINATING NEUROPATHY
	CHARCOT-MARIE-TOOTH DISEASE
	TOMACULOUS NEUROPATHY
	HEREDITARY SENSORY NEUROPATHY
	REFSUM DISEASE
	GIANT AXONAL NEUROPATHY
	ROSENBERG-CHUTORIAN NEUROPATHY
	ROUSSY-LEVY SYNDROME
STEELE-RICHARDSON-OLSZEWSKI DISEASE
CHRONIC INFLAMMATORY DEMYELINATING POLYNEUROPATHY
LAMBERT-EATON MYASTHENIC SYNDROME
HEREDITARY CONGENITAL MYOPATHIES*	CENTRAL CORE DISEASE
	CENTRONUCLEAR MYOPATHY
	DESMIN-RELATED MYOPATHY
	NEMALINIC MYOPATHY
MUSCULAR DYSTROPHIES*	BECKER MUSCULAR DYSTROPHY
	OCULOGASTROINTESTINAL MUSCULAR DYSTROPHY
	DUCHENNE MUSCULAR DYSTROPHY
	FACIOSCAPULOHUMERAL MUSCULAR DYSTROPHY
MYOTONIC DYSTROPHIES*	STEINERT DISEASE
	THOMSEN MYOTONIA
	PARAMYOTONIA CONGENITA OF VON EULENBURG
NORMOKALIEMIC, HYPOKALIEMIC AND HYPERKALIEMIC PERIODIC PARALYSES*
6. DISORDERS OF THE EYE AND ADNEXA (360-379)
FAMILIAL EXUDATIVE VITREORETINOPATHY
COATS DISEASE
EALES DISEASE
BEHR SYNDROME
INHERITED RETINAL DYSTROPHIES*	VITREORETINAL DEGENERATION
	RETINITIS PIGMENTOSA
	RETINITIS PUNCTATA ALBESCENS
	CONE DYSTROPHY
	STARGARDT DISEASE
	LEBER CONGENITAL AMAUROSIS
	BEST DISEASE
HEREDITARY CHOROIDAL DYSTROPHIES*
FUCHS HETEROCHROMIC IRIDOCYCLITIS
ESSENTIAL IRIS ATROPHY
CONGENITAL HEMERALOPIA
OGUCHI DISEASE
COGAN'S SYNDROME
CORNEAL DEGENERATIONS*	SALZMANN'S NODULAR CORNEAL DEGENERATION
	MARGINAL CORNEAL DEGENERATION
HEREDITARY CORNEAL DYSTROPHIES*	MEESMANN CORNEAL DYSTROPHY
	ANTERIOR CORNEAL DYSTROPHY
	GRANULAR CORNEAL DYSTROPHY
	LATTICE CORNEAL DYSTROPHY
	MACULAR CORNEAL DYSTROPHY
	STROMAL CORNEAL DYSTROPHIES
	CORNEA GUTTATA
	FUCHS ENDOTHELIAL CORNEAL DYSTROPHY
	POSTERIOR POLYMORPHOUS CORNEAL DYSTROPHY
KERATOCONUS
LIGNEOUS CONJUNCTIVITIS
LEBER OPTIC ATROPHY
7. DISEASES OF THE CIRCULATORY SYSTEM (390-459)
RHEUMATIC HEART DISEASE
MICROSCOPIC POLYANGIITIS
POLYARTERITIS NODOSA
KAWASAKI DISEASE
CHURG-STRAUSS SYNDROME
GOODPASTURE SYNDROME
WEGENER GRANULOMATOSIS
GIANT CELL ARTERITIS
THROMBOTIC MICROANGIOPATHIES*	THROMBOTIC THROMBOCYTOPENIC PURPURA
TAKAYASU ARTERITIS
RENDU-OSLER-WEBER DISEASE
BUDD-CHIARI SYNDROME
8. DISEASES OF THE DIGESTIVE SYSTEM (520-579)
ACHALASIA
GIANT HYPERTROPHIC GASTRITIS
EOSINOPHILIC GASTROENTERITIS
CHRONIC INTESTINAL PSEUDO-OBSTRUCTION
PRIMARY SCLEROSING CHOLANGITIS
MICROVILLOUS INCLUSION DISEASE
INTESTINAL LYMPHANGIECTASIA
9. DISEASES OF THE GENITOURINARY SYSTEM (580-629)
NEPHROGENIC DIABETES INSIPIDUS
RETROPERITONEAL FIBROSIS
INTERSTITIAL CYSTITIS
10. DISEASES OF THE SKIN AND SUBCUTANEOUS TISSUE (680-709)
ERYTHROKERATOLYSIS HIEMALIS
DERMATITIS HERPETIFORMIS
PEMPHIGUS
BULLOUS PEMPHIGOID
MUCOUS MEMBRANE PEMPHIGOID
11. DISEASES OF THE MUSCULOSKELETAL SYSTEM AND CONNECTIVE TISSUE (710-739)
DERMATOMYOSITIS
POLYMYOSITIS
MIXED CONNECTIVE TISSUE DISEASE
UNDIFFERENTIATED CONNECTIVE TISSUE SYNDROME
EOSINOPHILIC FASCIITIS
DIFFUSE FASCIITIS
POLYCHONDRITIS
12. CONGENITAL ANOMALIES (740-759)
ARNOLD-CHIARI SYNDROME
MICROCEPHALY
CEREBELLAR AGENESIS
JOUBERT SYNDROME
LISSENCEPHALY
HOLOPROSENCEPHALY
FOIX-CHAVANY-MARIE SYNDROME
FAMILIAL DYSAUTONOMIA
AXENFELD-RIEGER SYNDROME
PETERS ANOMALY
ANIRIDIA
COLOBOMA
MORNING GLORY SYNDROME
PERSISTENCE OF THE PUPILLARY MEMBRANE
BLUE RUBBER BLEB NEVUS
ESOPHAGEAL ATRESIA AND/OR TRACHEOESOPHAGEAL FISTULA
JEJUNAL ATRESIA
DUODENAL ATRESIA/STENOSIS
ANORECTAL MALFORMATION
HIRSCHSPRUNG DISEASE
BILIARY ATRESIA
CAROLI'S DISEASE
POLYCYSTIC LIVER DISEASE
TRUE HERMAPHRODITISM
PSEUDOHERMAPHRODITISMS*
MEDULLARY SPONGE KIDNEY
ARTHROGRYPOSIS MULTIPLEX CONGENITA
PHOCOMELIA
SPRENGEL DEFORMITY
SYNDROMIC ACROCEPHALOSYNDACTYLIES*	APERT SYNDROME
	GOODMAN SYNDROME
ACRODYSOSTOSIS
FAMILIAL CAMPTODACTYLY
CONGENITAL MALFORMATIONS OF SKULL AND/OR FACE BONES*	OPITZ C TRIGONOCEPHALY SYNDROME
	PRIMARY CRANIOSYNOSTOSIS
	CROUZON DISEASE
	OCULOMAXILLOFACIAL DYSOSTOSIS
	FRONTO-FACIO-NASAL DYSPLASIA
	MAXILLONASAL DYSPLASIA
	HALLERMAN-STREIFF SYNDROME
	PIERRE ROBIN SYNDROME
	TREACHER COLLINS SYNDROME
CAUDAL REGRESSION SYNDROME
KLIPPEL-FEIL SYNDROME
CHONDRODYSTROPHIES*	ACHONDROGENESIS
	ACHONDROPLASIA
	DYSPLASIA EPIPHYSEALIS HEMIMELICA
	ASPHYXIATING THORACIC DYSTROPHY
	MULTIPLE OSTEOCHONDROMAS
	KNIEST DYSPLASIA
	CAMPTOMELIC DYSPLASIA
OSTEOCHONDRODYSPLASIAS*	CRANIOMETAPHYSEAL DYSPLASIA
	OSTEOGENESIS IMPERFECTA
	OSTEOPETROSIS
	OSTEOFIBROUS DYSPLASIA
	ELLIS-VAN CREVELD SYNDROME
	SPONDYLOEPIPHYSEAL DYSPLASIA TARDA
	MULTIPLE EPIPHYSEAL DYSPLASIAS
	CONRADI-HÜNERMANN-HAPPLE SYNDROME
	DYSCHONDROSTEOSIS
	PSEUDODIASTROPHIC AND DIASTROPHIC DYSPLASIA
	CAMURATI-ENGELMANN DISEASE
	MCCUNE-ALBRIGHT SYNDROME
GASTROSCHISIS
EHLERS-DANLOS SYNDROME
ADAMS-OLIVER SYNDROME
COFFIN-LOWRY SYNDROME
COFFIN-SIRIS SYNDROME
DYGGVE-MELCHIOR-CLAUSEN DISEASE
FILIPPI SYNDROME
GREIG CEPHALOPOLYSYNDACTYLY SYNDROME
JACKSON-WEISS SYNDROME
JARCHO-LEVIN SYNDROME
PALLISTER-W SYNDROME
POLAND SYNDROME
SIRENOMELIA
CEREBRO-COSTO-MANDIBULAR SYNDROME
FEMORAL-FACIAL SYNDROME
OTOPALATODIGITAL SYNDROME
TRISMUS-PSEUDOCAMPTODACTYLY SYNDROME
WEAVER SYNDROME
CONGENITAL ICHTHYOSES*	CONGENITAL ICHTHYOSIS
	ICHTHYOSIS HYSTRIX CURTH-MACKLIN TYPE
	LAMELLAR ICHTHYOSIS
	HARLEQUIN ICHTHYOSIS
	X-LINKED ICHTHYOSIS
	NETHERTON SYNDROME
CUTIS LAXA
INCONTINENTIA PIGMENTI
XERODERMA PIGMENTOSUM
KERATOSIS FOLLICULARIS
CUTIS MARMORATA TELANGIECTATICA CONGENITA
DARIER DISEASE
DYSKERATOSIS CONGENITA
EPIDERMOLYSIS BULLOSA
PROGRESSIVE SYMMETRIC ERYTHROKERATODERMIA
ERYTHROKERATODERMIA VARIABILIS
EPIDERMOLYTIC HYPERKERATOSIS
FOCAL DERMAL HYPOPLASIA
PACHYDERMOPERIOSTOSIS
PSEUDOXANTHOMA ELASTICUM
APLASIA CUTIS CONGENITA
PARRY-ROMBERG SYNDROME
CRI-DU CHAT SYNDROME
TURNER SYNDROME
KLINEFELTER SYNDROME
WOLF-HIRSCHHORN SYNDROME
MELAS SYNDROME
MERRF SYNDROME
SHORT SYNDROME
ANEUPLOID CHROMOSOMAL SYNDROMES*
CHROMOSOMAL DUPLICATION/DELETION SYNDROMES *
IVEMARK SYNDROME
TUBEROUS SCLEROSIS
PEUTZ-JEGHERS SYNDROME
STURGE-WEBER SYNDROME
VON HIPPEL-LINDAU DISEASE
AARSKOG SYNDROME
ANTLEY-BIXLER SYNDROME
BALLER-GEROLD SYNDROME
BECKWITH-WIEDEMANN SYNDROME
BLOOM SYNDROME
BORJESON-FORSSMAN-LEHMANN SYNDROME
CHARGE SYNDROME
DE MORSIER SYNDROME
DUBOWITZ SYNDROME
EEC SYNDROME
FREEMAN-SHELDON SYNDROME
FRYNS SYNDROME
GOLDENHAR SYNDROME
HERMANSKY-PUDLAK SYNDROME
HOLT-ORAM SYNDROME
KABUKI SYNDROME
KARTAGENER SYNDROME
MAFFUCCI SYNDROME
MARSHALL SYNDROME
MECKEL SYNDROME
MOEBIUS SYNDROME
NAGER SYNDROME
NOONAN SYNDROME
OPITZ SYNDROME
PALLISTER-HALL SYNDROME
PFEIFFER SYNDROME
ROBERTS SYNDROME
ROBINOW SYNDROME
RUSSELL-SILVER SYNDROME
SCHINZEL-GIEDION SYNDROME
SECKEL SYNDROME
PENA-SHOKEIR I SYNDROME
SIMPSON-GOLABI-BEHMEL SYNDROME
BRANCHIO-OCULO-FACIAL SYNDROME
BRANCHIO-OTO-RENAL SYNDROME
CARDIOFACIOCUTANEOUS SYNDROME
OCULOCEREBROCUTANEOUS SYNDROME
PROTEUS SYNDROME
TRICHORHINOPHALANGEAL SYNDROME
NAIL-PATELLA SYNDROME
SMITH-LEMLI-OPITZ SYNDROME TYPE I
SMITH-MAGENIS SYNDROME
STICKLER SYNDROME
SUMMITT SYNDROME
TOWNES-BROCKS SYNDROME
VACTERL/VATER ASSOCIATION
WILDERVANCK SYNDROME
WILLIAMS SYNDROME
WINCHESTER SYNDROME
WOLFRAM SYNDROME
ANGELMAN SYNDROME
PRADER-WILLI SYNDROME
MARFAN SYNDROME
FRAGILE X SYNDROME
AASE-SMITH SYNDROME
ALAGILLE SYNDROME
ALPORT SYNDROME
ALSTRÖM SYNDROME
MULTIPLE CONGENITAL ANOMALIES WITH MENTAL RETARDATION*
BARDET-BIEDL SYNDROME
CARPENTER SYNDROME
COCKAYNE SYNDROME
CORNELIA DE LANGE SYNDROME
DE SANCTIS-CACCHIONE SYNDROME
DENYS-DRASH SYNDROME
OCULODENTODIGITAL SYNDROME
SPONDYLOEPIPHYSEAL DYSPLASIA CONGENITA
FRASER SYNDROME
HAY-WELLS SYNDROME
ITO HYPOMELANOSIS
ISAACS SYNDROME
KID SYNDROME
KLIPPEL-TRENAUNAY SYNDROME
LANDAU-KLEFFNER SYNDROME
LEOPARD SYNDROME
LEVY-HOLLISTER SYNDROME
MARSHALL-SMITH SYNDROME
NEU-LAXOVA SYNDROME
NEUROACANTHOCYTOSIS
NORRIE DISEASE
PALLISTER-KILLIAN SYNDROME
PEARSON SYNDROME
POEMS SYNDROME
RUBINSTEIN-TAYBI SYNDROME
ACROCALLOSAL SYNDROME
CEREBROOCULOFACIOSKELETAL (COFS) SYNDROME
DYSPLASTIC NEVUS SYNDROME
EPIDERMAL NEVUS SYNDROME
MULTIPLE PTERYGIUM SYNDROME
TRICHO-DENTO-OSSEOUS SYNDROME
THROMBOCYTOPENIA-ABSENT RADIUS (TAR) SYNDROME
SJÖGREN-LARSSON SYNDROME
TAY SYNDROME
VOGT-KOYANAGI-HARADA DISEASE
WAGR SYNDROME
WALKER-WARBURG SYNDROME
WEILL-MARCHESANI SYNDROME
ZELLWEGER SYNDROME
13. CERTAIN CONDITIONS ORIGINATING IN THE PERINATAL PERIOD (760-779)
CONGENITAL RUBELLA SYNDROME
FETAL VALPROATE SYNDROME
FETAL HYDANTOIN SYNDROME
FETAL ALCOHOL SYNDROME
APNEA OF PREMATURITY
CONGENITAL HEPATIC FIBROSIS
14. SYMPTOMS, SIGNS, AND ILL-DEFINED CONDITIONS (780-799)
GERSTMANN SYNDROME
* Groups of monitored diseases for which some examples of included diseases entities are provided according to the Italian Legislation on rare diseases (reference 31)
